# Supplementary material for: Calnexin, an ER-induced protein, is a prognostic marker and potential therapeutic target in colorectal cancer
Source: PubMed Central journal article supplement (PMC4930591; doi:10.1186/s12967-016-0948-z), 2016-07-01

# Supplementary Figure 4

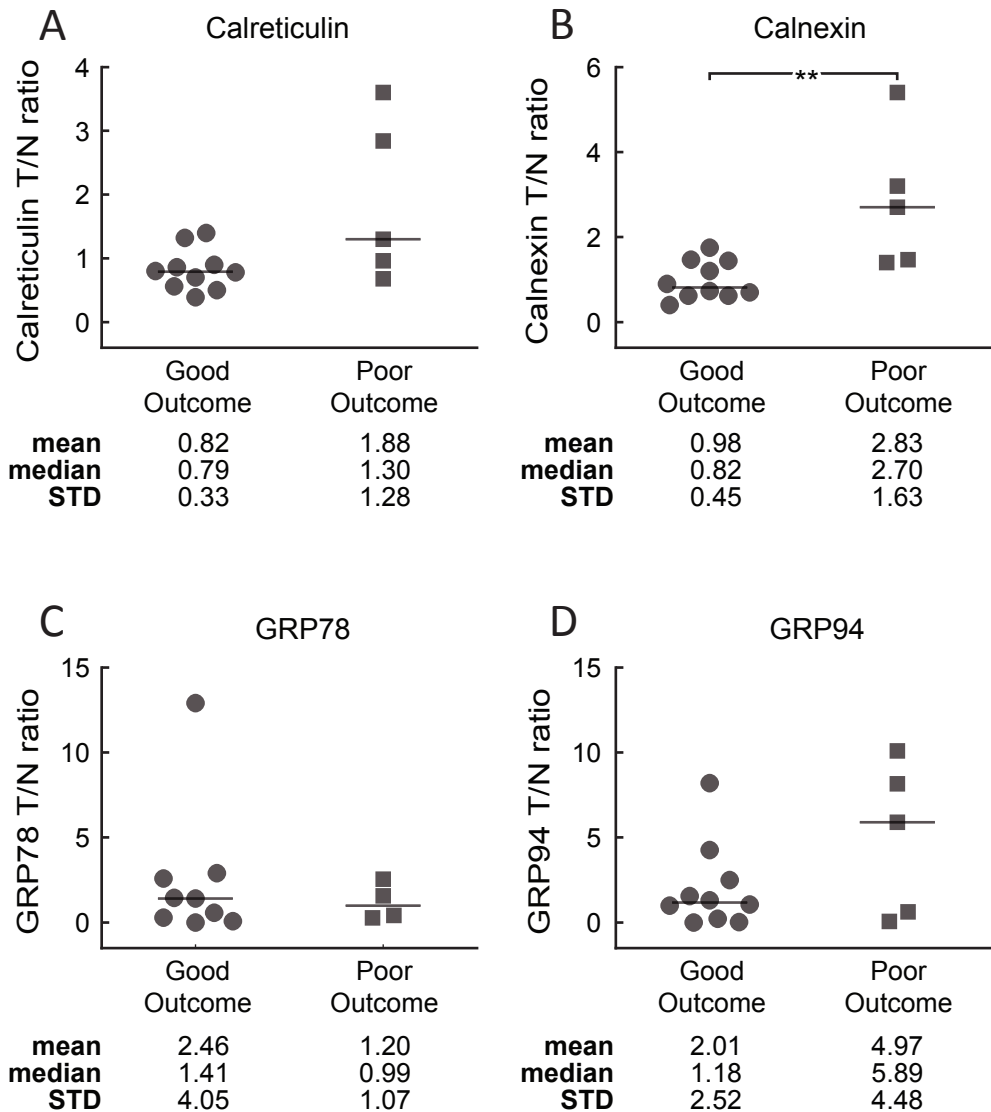

Supplement: 12967_2016_948_MOESM5_ESM.pdf [file 12967_2016_948_MOESM5_ESM.pdf]
