# Supplementary material for: Calnexin, an ER-induced protein, is a prognostic marker and potential therapeutic target in colorectal cancer
Source: J Transl Med. 2016 Jul 1;14:196. doi: 10.1186/s12967-016-0948-z (PMC4930591; doi:10.1186/s12967-016-0948-z)
Supplement: Supplementary file 1 — 10.1186/s12967-016-0948-z and S2. Densitometric levels for ER stress proteins calreticulin, calnexin, GRP78 and GRP94 in CRC patients by quantitive western blotting. [file 12967_2016_948_MOESM1_ESM.xlsx]

## Sheet: Supp Table 1
		Calnexin			Calreticulin			Grp78N			Grp94
	Patient	N	T	ratio T/N	N	T	ratio T/N	N	T	ratio T/N	N	T	ratio T/N
	1	0.126	0.181	1.43651	0.7096	0.613	0.863867	0.027	0.028	1.03704	0.0256	0.0165	0.644531
	2	0.07	0.18	2.57143	0.03	0.05	1.66667	0.067	0.119	1.77612	0.011	0.0366	3.32727
	3	1.42	2.4	1.69014	0.52	0.43	0.826923	1.255	2.475	1.97211	1.38	1.056	0.765217
	4	0.66	0.48	0.727273	0.42	0.56	1.33333	0.115	0.03	0.26087	0.0995	0.079	0.79397
	5	0.49	0.68	1.38776	0.48	1.14	2.375	0.107	0.111	1.03738	0.075	0.198	2.64
	6	0.95	0.87	0.915789	0.43	0.97	2.25581	na	na	na	0.154	0.696	4.51948
	7	0.434	1.093	2.51843	0.6597	0.479	0.726088	na	na	na	0.043	0.033	0.767442
	8	0.14	0.22	1.57143	0.05	0.04	0.8	0.15	0.0855	0.57	0.0153	0.0238	1.55556
	9	0.36	0.32	0.888889	0.04	0.06	1.5	na	na	na	0.0486	0.0487	1.00206
	10	0.5	0.7	1.4	0.46	0.44	0.956522	0.06	0.016	0.266667	0.479	0.029	0.0605428
	11	0.17	0.02	0.117647	1	0.97	0.97	0.116	0.168	1.44828	0.107	0.154	1.43925
	12	0.95	0.87	0.915789	0.45	0.41	0.911111	0.1	0.3	3	0.205	0.269	1.3122
	13	0.2957	0.525	1.77545	0.666	0.451	0.677177	0.087	0.036	0.413793	0.05	0.03	0.6
	14	0.65	0.48	0.738462	0.38	0.22	0.578947	0.59	0.0001	0.000169492	0.211	0.0031	0.0146919
	15	0.245	0.36	1.46939	0.645	0.9	1.39535	na	na	na	0.0087	0.037	4.25287
	16	0.18	0.95	5.27778	0.12	0.42	3.5	na	na	na	0.009	0.074	8.22222
	17	0.54	0.37	0.685185	0.42	0.38	0.904762	0.166	0.428	2.57831	0.068	0.169	2.48529
	18	0.31	0.85	2.74194	0.16	0.44	2.75	0.047	0.119	2.53191	0.017	0.099	5.82353
	19	0.9	0.56	0.622222	0.83	0.57	0.686747	0.225	0.018	0.08	0.345	0.078	0.226087
	20	0.99	1.5	1.51515	0.54	0.21	0.388889	0.15	0.04	0.266667	0.596	0.0001	0.000167785
	21	0.3	0.94	3.13333	0.34	0.45	1.32353	0.05	0.079	1.58	0.03	0.307	10.2333
	22	0.9	0.56	0.622222	0.6	0.3	0.5	0.006	0.084	14	0.036	0.294	8.16667
	23	0.247	0.356	1.4413	0.607	0.8	1.31796	0.05	0.07	1.4	0.0314	0.0312	0.993631
		All measurements were normalised to Actin
		na = no measurement

## Sheet: Supp Table 2
		Calnexin Band	Calnexin Band
		Relative to 10ug	Relative to 10ug	Ratio
	Sample ID	HCT116	HCT116	Calnexin/Actin
	1	0.07	0.38	0.18
	2	0.17	0.93	0.19
	3	0.22	2.1	0.1
	4	0.03	1.52	0.02
	5	3.89	1.74	2.24
	6	1.09	1.81	0.6
	7	0.2	0.98	0.21
	8	1.19	2.06	0.58
	9	0.13	0.23	0.58
	10	1.01	1.98	0.51
	11	0.15	0.17	0.88
	All measurements were normalised to Actin and HCT116 cells
